# Supplementary material for: Restoration of Olfactory Memory in Drosophila Overexpressing Human Alzheimer’s Disease Associated Tau by Manipulation of L-Type Ca2+ Channels
Source: Front Cell Neurosci. 2019 Sep 10;13:409. doi: 10.3389/fncel.2019.00409 (PMC6746915; doi:10.3389/fncel.2019.00409)
Supplement: Supplementary file 1 [file Presentation_1.pdf]

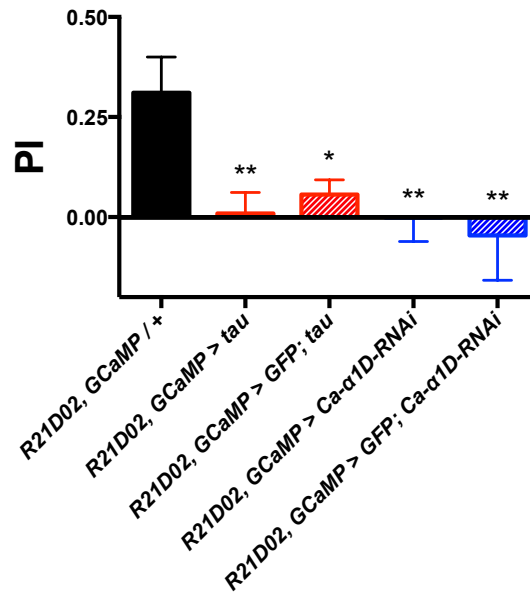

**Figure S1: Control memory experiments.** Gal4 dilution was not responsible for restoration of memory in double transgene flies. Co-expression of either tau or *Ca-α1D-RNAi* with the innocuous transgene GFP resulted in animals with impaired memory ( $p < 0.0001$ ) not significantly different to tau or *Ca-α1D-RNAi* expressed on their own ( $p = 0.965$  and  $p = 0.74$ , one-way ANOVA). Note that *R21D02, GCaMP / +*, *R21D02, GCaMP > tau* and *R21D02, GCaMP > Ca-α1D-RNAi* are the same as in Fig 1B.

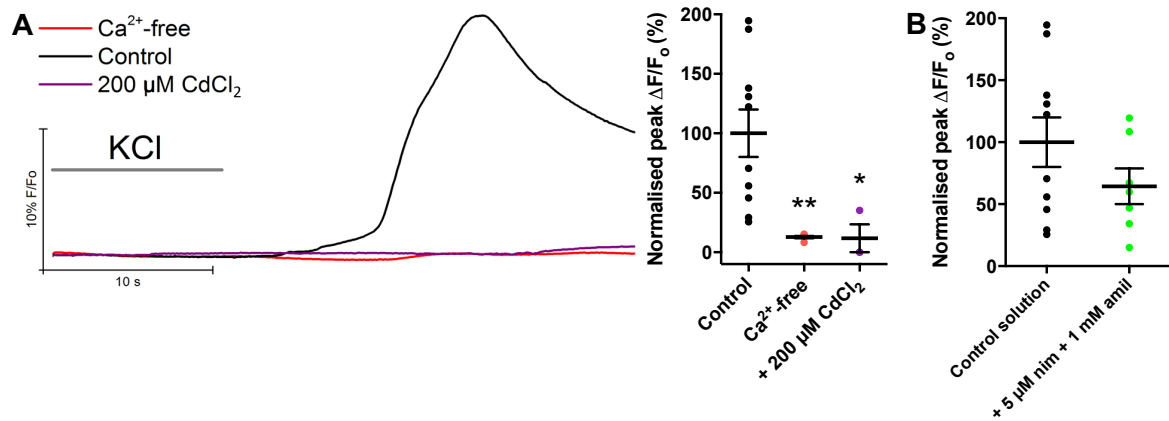

**Figure S2:  $\text{Ca}^{2+}$  transients in control M4/6 neurons rely on influx through nimodipine- and amiloride-insensitive  $\text{Ca}^{2+}$  channels.** (A, left) Example fluorescence trace showing that omission of  $\text{Ca}^{2+}$  from the bath solution (red) or addition of 200  $\mu\text{M}$  cadmium (purple) ablated the  $\text{Ca}^{2+}$  transient. (A, right) Grouped data from these experiments (Kruskal-Wallis test). (B) Addition of 5  $\mu\text{M}$  nimodipine and 1 mM amiloride to the bath solution did not reduce the peak magnitude of the  $\text{Ca}^{2+}$  transients (t-test).

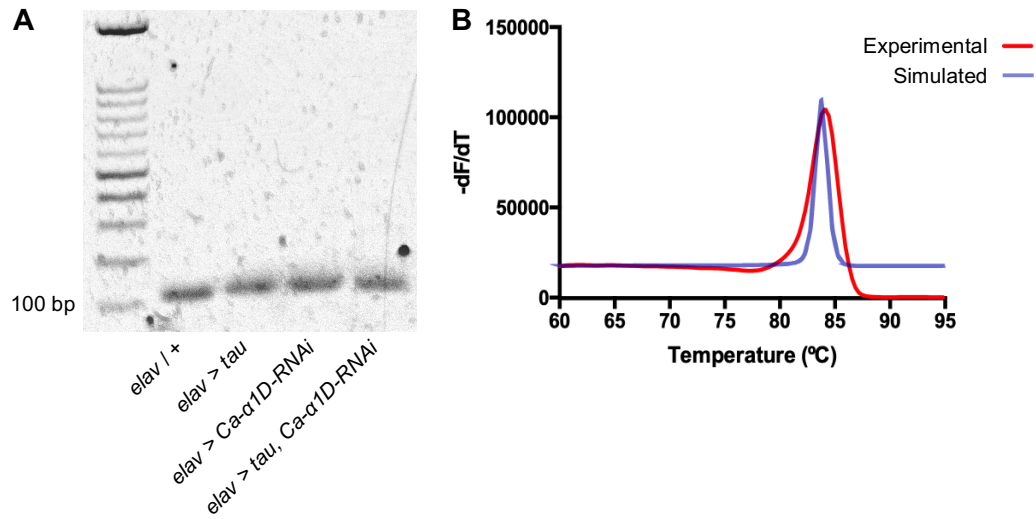

**Figure S3. Primer specificity for *Ca-α1D* quantitative PCR.** (A) The obtained qPCR reaction product of the expected size of 108 bp is observed in all genotypes. (B) The observed temperature dependent fluorescence change was used for melting curve analysis. A single product was obtained (red line) and fit with the predicted melting curve obtained by uMelt software (blue (Dwight et al., 2011)).

**Table S1: Tau or *Ca-α1D-RNAi* expression did not cause sensorimotor defects.**

Tau or *Ca-α1D-RNAi* did not affect avoidance of shock, 3-octanol (Oct) or 4-methylcyclohexanol (MCH).

| genotype                                   | % Shock avoidance<br>(mean ± SEM) | Oct avoidance<br>(mean ± SEM) | MCH avoidance<br>(mean ± SEM) |
|--------------------------------------------|-----------------------------------|-------------------------------|-------------------------------|
| <i>OK107 / +</i>                           | 83.6 ± 6.2                        | 0.76 ± 0.05                   | 0.77 ± 0.08                   |
| <i>OK107 &gt; tau</i>                      | 85.3 ± 2.6                        | 0.82 ± 0.04                   | 0.70 ± 0.01                   |
| <i>OK107 &gt; Ca-α1D-RNAi</i>              | 81.0 ± 2.3                        | 0.64 ± 0.04                   | 0.73 ± 0.02                   |
| <i>OK107 &gt; tau, Ca-α1D-RNAi</i>         | 94.0 ± 2.3                        | 0.74 ± 0.13                   | 0.83 ± 0.10                   |
| <i>R21D02, GCaMP / +</i>                   | 79.1 ± 2.1                        | 0.60 ± 0.12                   | 0.43 ± 0.16                   |
| <i>R21D02, GCaMP &gt; tau</i>              | 79.2 ± 4.6                        | 0.64 ± 0.08                   | 0.55 ± 0.02                   |
| <i>R21D02, GCaMP &gt; Ca-α1D-RNAi</i>      | 83.0 ± 1.2                        | 0.68 ± 0.04                   | 0.74 ± 0.06                   |
| <i>R21D02, GCaMP &gt; tau, Ca-α1D-RNAi</i> | 81.2 ± 2.6                        | 0.45 ± 0.09                   | 0.44 ± 0.07                   |
| <i>R21D02, GCaMP &gt; GFP; tau</i>         | 84.3 ± 4.9                        | 0.77 ± 0.13                   | 0.56 ± 0.07                   |
| <i>R21D02, GCaMP &gt; GFP; Ca-α1D-RNAi</i> | 93.7 ± 1.9                        | 0.69 ± 0.06                   | 0.85 ± 0.02                   |
| <i>c305a / +</i>                           | 80.9 ± 3.4                        | 0.60 ± 0.12                   | 0.75 ± 0.04                   |
| <i>c305a &gt; tau</i>                      | 80.0 ± 4.4                        | 0.77 ± 0.05                   | 0.77 ± 0.04                   |
| <i>MB247 / +</i>                           | 77.3 ± 2.5                        | 0.71 ± 0.05                   | 0.66 ± 0.06                   |
| <i>MB247 &gt; tau</i>                      | 71.3 ± 6.5                        | 0.85 ± 0.07                   | 0.88 ± 0.05                   |
| <i>amn(c316) / +</i>                       | 83.2 ± 2.9                        | 0.60 ± 0.04                   | 0.65 ± 0.02                   |
| <i>amn(c316) &gt; tau</i>                  | 81.1 ± 0.8                        | 0.77 ± 0.04                   | 0.75 ± 0.05                   |
| <i>tau / +</i>                             | 97.0 ± 1.3                        | 0.79 ± 0.06                   | 0.89 ± 0.04                   |
| <i>Ca-α1D-RNAi / +</i>                     | 94.0 ± 2.1                        | 0.58 ± 0.05                   | 0.67 ± 0.17                   |
| <i>tau, Ca-α1D-RNAi / +</i>                | 97.8 ± 1.3                        | 0.69 ± 0.12                   | 0.59 ± 0.09                   |
